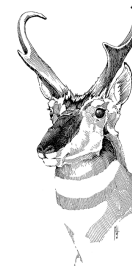

## Corrigendum to: State-dependent foraging by caribou with different nutritional requirements

KRISTIN DENRYTER, RACHEL C. COOK, JOHN G. COOK, KATHERINE L. PARKER, AND MICHAEL P. GILLINGHAM

© The Author(s) 2020. Published by Oxford University Press on behalf of the American Society of Mammalogists.

This is an Open Access article distributed under the terms of the Creative Commons Attribution Non-Commercial License

(<http://creativecommons.org/licenses/by-nc/4.0/>), which permits non-commercial re-use, distribution, and reproduction in any medium, provided the original work is properly cited. For commercial re-use, please contact [journals.permissions@oup.com](mailto:journals.permissions@oup.com)

In the paper “State-dependent foraging by caribou with different nutritional requirements,” equation 3 was reported incorrectly in the Results and [Supplementary Data SD3](#). The last paragraph of the Results should read:

“To understand the relative contribution of differences in foraging time between lactating and non-lactating adult caribou (Fig. 6B) to the differences we observed in daily intakes of dry matter, digestible energy, and digestible protein, we conducted a follow-up analysis using a multilevel model. Equation 3 is the difference in foraging time between non-lactating and lactating caribou from that multilevel model:

$$y = 0.202x + 1.4 \quad (3)$$

where  $y$  is difference in foraging time (in hours) and  $x$  is per-minute intake of dry matter. Adjusting foraging time of nonlactating caribou to that of lactating caribou using equation 3 removed all effects of nutritional class on daily intakes of dry

matter, digestible energy, and digestible protein ([Supplementary Data SD3](#)).

Similarly, the figure caption for Supplementary Data 3 should read:

“Fig. SD3-1.—Relationships between per-minute intake and (A) foraging time, (B) daily intake of dry matter, (C) daily intake of digestible protein, and (D) daily intake of digestible energy for lactating and non-lactating adult caribou (*Rangifer tarandus*) fit using multilevel models with individuals modeled with a random intercept and random slope included for per-minute intake (see text). Dashed lines represent data for non-lactating animals modeled to the levels of lactating animals using a multilevel model (Eq. 3:  $y = 0.202x + 1.4$ ), where  $y$  is difference in foraging time (in hours) and  $x$  is per-minute intake of dry matter. Results show that adjusting foraging time removed most differences in daily intakes of digestible energy, digestible protein, and dry matter between lactating and non-lactating caribou.”

The authors regret this error.
